# Supplementary material for: Improving gridded snow water equivalent products in British Columbia, Canada: multi-source data fusion by neural network models
Source: Copernicus journal article supplement (doi:10.5194/tc-12-891-2018), 2018-03-12
Supplement: Supplementary file 1 [file tc-12-891-2018-supplement.pdf]

Supplement of The Cryosphere, 12, 891–905, 2018  
<https://doi.org/10.5194/tc-12-891-2018-supplement>  
© Author(s) 2018. This work is distributed under  
the Creative Commons Attribution 3.0 License.

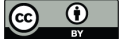

*Supplement of*

## **Improving gridded snow water equivalent products in British Columbia, Canada: multi-source data fusion by neural network models**

**Andrew M. Snauffer et al.**

*Correspondence to:* Andrew M. Snauffer ([asnauffer@eoas.ubc.ca](mailto:asnauffer@eoas.ubc.ca))

The copyright of individual parts of the supplement might differ from the CC BY 3.0 License.

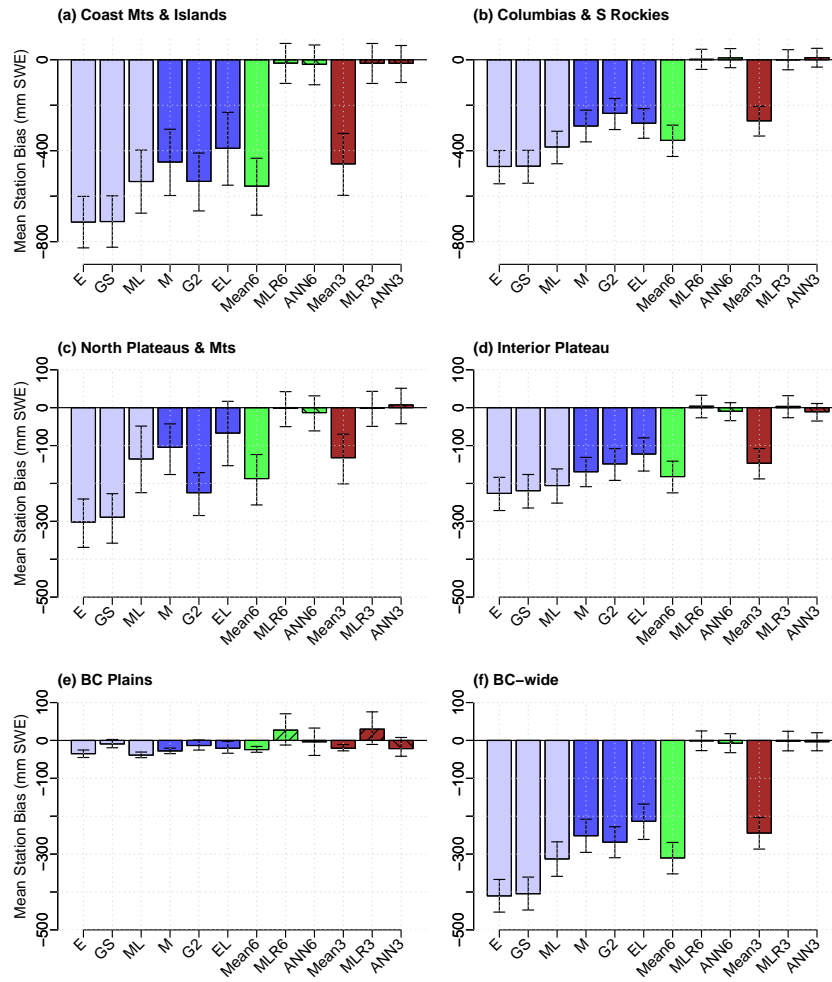

**Figure S1.** Mean station bias for several SWE products/combinations for regions of BC in order of descending mean accumulations: (a) Coast Mountains and Islands, (b) Columbia Mountains and Southern Rockies, (c) Northern Plateaus and Mountains, (d) Interior Plateau, (e) BC Plains, and (f) province-wide (combining all data from the five preceding panels). Shown are biases with 95% confidence intervals based on  $n = 5000$  bootstrap samples for the six gridded products in blue: ERA-Interim (E), GlobSnow (GS), MERRALand (ML), MERRA (M), GLDAS2 (G2) and ERA-Land (EL). Dark blue indicates three best performing products. Also shown are three fusion techniques (mean, MLR and ANN) using all six products (green) and the three best performing products (brown). Note the vertical scale differences.
